# Supplementary material for: The Impact of Preconceptional Multiple-Micronutrient Supplementation on Female Fertility
Source: PubMed Central journal article supplement — Clin Med Insights Womens Health. 2019 Apr 23;12:1179562X19843868. doi: 10.1177/1179562X19843868 (PMC6480978; doi:10.1177/1179562x19843868), 2019-04-23
Supplement: MMN_in_fertility_Supplementary_Table_Revised_highlighted_xyz16683afde360c_2-converted.pdf [file MMN_in_fertility_Supplementary_Table_Revised_highlighted_xyz16683afde360c_2-converted.pdf]

**Supplementary Table. Effects of supplementation with multiple micronutrients on fertility mechanisms and outcomes**

| Study (country)                           | Study characteristics                                |                 | Number of patients, N         |                  | Mean age $\pm$ SD (range), y | Supplements/control groups                                                    |             | Results                                                                                                                                                                                                                                                                                                                                                                        | Author conclusions                                                                                                                                                                                                                                |
|-------------------------------------------|------------------------------------------------------|-----------------|-------------------------------|------------------|------------------------------|-------------------------------------------------------------------------------|-------------|--------------------------------------------------------------------------------------------------------------------------------------------------------------------------------------------------------------------------------------------------------------------------------------------------------------------------------------------------------------------------------|---------------------------------------------------------------------------------------------------------------------------------------------------------------------------------------------------------------------------------------------------|
|                                           | Design                                               | Duration        | Multiple micronutrients (MMN) | Control group(s) |                              | Investigational product: folate [ $\mu$ g] vs. Control                        | Taken PC    |                                                                                                                                                                                                                                                                                                                                                                                |                                                                                                                                                                                                                                                   |
| Effect in healthy women                   |                                                      |                 |                               |                  |                              |                                                                               |             |                                                                                                                                                                                                                                                                                                                                                                                |                                                                                                                                                                                                                                                   |
| Czeizel et al 1996 <sup>1</sup> (Hungary) | Double-blind RCT in women planning pregnancy         | ~4 mo           | 3953                          | 3952             | 26.9 $\pm$ 3.4               | Elevit (Bayer): 800 vs. Trace element supplement (Cu, Mn, Zn, vit. C)         | Yes, and T1 | <ul style="list-style-type: none"> <li>Significantly higher number of confirmed pregnancies with MMN (2553, 64.6%) vs. trace elements (2466, 62.3%) (excl. non-supplemented women)</li> <li>Time to conception was shorter with MMN (3.8 menstrual cycles) vs. trace elements (4.0 cycles), suggesting a 5% increase in fertility</li> </ul>                                   | <ul style="list-style-type: none"> <li>Preconceptional MMN supplementation causes a slight but significant increase in fertility due to the shorter achievement of conception</li> </ul>                                                          |
| Cueto et al 2015 <sup>2</sup> (Denmark)   | Prospective cohort study in women planning pregnancy | Varied duration | 2560                          | 1335             | 28.6 (supplement group)      | FA and/or MMN (either used alone or together; type not specified) vs. Non-use | Yes         | <ul style="list-style-type: none"> <li>Increased fecundability with supplement use</li> <li>Stronger association among women with irregular cycles and those with either short or long cycle length</li> </ul>                                                                                                                                                                 | <ul style="list-style-type: none"> <li>Longer duration of supplementation (<math>\geq</math>1 year) did not increase fecundability</li> </ul>                                                                                                     |
| Chavarro et al 2008 <sup>3</sup> (USA)    | Prospective cohort study in women planning pregnancy | 8 years FO      | 10451                         | 8104             | 32.5 (supplement group)      | MMN (type not specified) vs. Non-use                                          | Yes         | <ul style="list-style-type: none"> <li>Inverse association between frequency of MMN use and risk of ovulatory infertility</li> <li>RR of ovulatory infertility with MMN use compared with non-use was 0.88 for women consuming <math>\leq</math>2 tablets/week, 0.69 for women consuming 3-5 tablets/week, 0.59 for women consuming <math>\geq</math>6 tablets/week</li> </ul> | <ul style="list-style-type: none"> <li>Folic acid appeared to explain part of the association between MMN use and risk of ovulatory infertility</li> <li>Regular use of MMN supplements may decrease the risk of ovulatory infertility</li> </ul> |

| Study (country)                                  | Study characteristics                                                                                 |          | Number of patients, N         |                  | Mean age ± SD (range), y | Supplements/control groups                                |          | Results                                                                                                                                                                                                                                                                                                                                                                                                                                                                                                                                                  | Author conclusions                                                                                                                                                                                                                                                                       |
|--------------------------------------------------|-------------------------------------------------------------------------------------------------------|----------|-------------------------------|------------------|--------------------------|-----------------------------------------------------------|----------|----------------------------------------------------------------------------------------------------------------------------------------------------------------------------------------------------------------------------------------------------------------------------------------------------------------------------------------------------------------------------------------------------------------------------------------------------------------------------------------------------------------------------------------------------------|------------------------------------------------------------------------------------------------------------------------------------------------------------------------------------------------------------------------------------------------------------------------------------------|
|                                                  | Design                                                                                                | Duration | Multiple micronutrients (MMN) | Control group(s) |                          | Investigational product: folate [µg] vs. Control          | Taken PC |                                                                                                                                                                                                                                                                                                                                                                                                                                                                                                                                                          |                                                                                                                                                                                                                                                                                          |
| Effect in women undergoing infertility treatment |                                                                                                       |          |                               |                  |                          |                                                           |          |                                                                                                                                                                                                                                                                                                                                                                                                                                                                                                                                                          |                                                                                                                                                                                                                                                                                          |
| <i>Restoring micronutrient levels</i>            |                                                                                                       |          |                               |                  |                          |                                                           |          |                                                                                                                                                                                                                                                                                                                                                                                                                                                                                                                                                          |                                                                                                                                                                                                                                                                                          |
| La Vecchia <sup>4</sup> (Italy)                  | Cross-sectional study in women undergoing IVF; analysis of plasma levels of vitamins or microelements | —        | 125                           | 144              | 37.1±3.5                 | FA supplement (type not specified) vs. Non-use            | Yes      | <ul style="list-style-type: none"> <li>• Users significantly more likely to have adequate levels of serum folate, RBC folate and HCY compared with non-users</li> <li>• Only a minority of participants reached adequate levels of RBC folate despite long-term FA supplementation: proportion of replete women (&gt;400 ng/ml): 25% and 23% in participants women using FA supplementation for &gt;12 and &lt;12 months, respectively</li> <li>• In the absence of FA supplementation, the proportion of replete women was nearly negligible</li> </ul> | <ul style="list-style-type: none"> <li>• Folate levels largely inadequate in women undergoing IVF, but higher in women using supplements vs. non-users</li> <li>• There is a need to promote recommendations for FA supplementation among women attending infertility clinics</li> </ul> |
| Özkaya et al 2011 <sup>5</sup> (Turkey)          | PBO-controlled RCT in IVF patients                                                                    | 45 d     | 26                            | 43               | 28.8±3.2 (22-43)         | Megadyn Pronatal Film Tablet (Mecom Inc): 800 vs. Placebo | Yes      | <ul style="list-style-type: none"> <li>• IVF vs. controls: ↓selenium and zinc in FF and serum; ↓copper in serum; ↑ iron in FF and serum</li> <li>• Supplementation vs. untreated IVF: ↑ copper, zinc, selenium in FF and serum; ↓iron in FF; calcium, magnesium levels unaffected</li> </ul>                                                                                                                                                                                                                                                             | <ul style="list-style-type: none"> <li>• Copper, zinc, and selenium in serum and FF were lower in women undergoing IVF</li> <li>• MMN supplementation in serum and FF of such women normalized trace element levels</li> </ul>                                                           |

| Study (country)                                                       | Study characteristics                                                                  |                                                          | Number of patients, N         |                  | Mean age ± SD (range), y | Supplements/control groups                                |          | Results                                                                                                                                                                                                                                                                                                                                                                       | Author conclusions                                                                                                                                                                                                         |
|-----------------------------------------------------------------------|----------------------------------------------------------------------------------------|----------------------------------------------------------|-------------------------------|------------------|--------------------------|-----------------------------------------------------------|----------|-------------------------------------------------------------------------------------------------------------------------------------------------------------------------------------------------------------------------------------------------------------------------------------------------------------------------------------------------------------------------------|----------------------------------------------------------------------------------------------------------------------------------------------------------------------------------------------------------------------------|
|                                                                       | Design                                                                                 | Duration                                                 | Multiple micronutrients (MMN) | Control group(s) |                          | Investigational product: folate [µg] vs. Control          | Taken PC |                                                                                                                                                                                                                                                                                                                                                                               |                                                                                                                                                                                                                            |
| Sun et al 2013 <sup>6</sup> (China)                                   | PBO-controlled RCT in IVF patients                                                     | 60 d                                                     | 60                            | 55               | 28.8                     | Elevit (Bayer): 800 vs. Placebo                           | Yes      | <ul style="list-style-type: none"> <li>• IVF vs. controls: ↓copper and zinc in serum</li> <li>• Supplementation vs. untreated IVF: ↑copper, zinc and manganese in serum; ↑copper and zinc in FF; ↓iron in FF; iron and calcium in serum unaffected</li> </ul>                                                                                                                 | <ul style="list-style-type: none"> <li>• Taking MMN might normalize trace element levels in the serum and FF of women undergoing IVF</li> </ul>                                                                            |
| <i>Impact on antioxidant defenses, oxidative stress and fertility</i> |                                                                                        |                                                          |                               |                  |                          |                                                           |          |                                                                                                                                                                                                                                                                                                                                                                               |                                                                                                                                                                                                                            |
| Özkaya et al 2010 <sup>7</sup> (Turkey)                               | PBO-controlled RCT in IVF patients                                                     | 45 d                                                     | 26                            | 43               | 28.8±3.2 (22-43)         | Megadyn Pronatal Film Tablet (Mecom Inc): 800 vs. Placebo | Yes      | <ul style="list-style-type: none"> <li>• IVF: significantly ↓antioxidant vitamins (C, GSH-Px) and ↑LP in FF and serum</li> <li>• Supplementation vs. untreated IVF: significantly ↑GSH, vit. C &amp; E in serum, ↑GSH-Px and vit. C in FF; significantly ↓LP in FF and serum</li> </ul>                                                                                       | <ul style="list-style-type: none"> <li>• MMN supplementation in women undergoing IVF may strengthen the antioxidant defense system by decreasing oxidative stress</li> </ul>                                               |
| Luddi et al 2016 <sup>8</sup> (Italy)                                 | Preliminary study in IVF patients (no MMN in first COS cycle, MMN in second COS cycle) | MMN used for 3 mo before and throughout second COS cycle | 18                            | —                | 40.3±1.2                 | Elevit (Bayer): 800 vs. Non-use in first COS cycle        | Yes      | <ul style="list-style-type: none"> <li>• MMN (used in the second COS cycle only) protected the follicular microenvironment and serum proteins from oxidative damage</li> <li>• Significant increase in mean number of good quality oocytes after MMN usage</li> <li>• In the treated cycle, a total of 3 ongoing pregnancies (pregnancy rate=17.7%) was registered</li> </ul> | <ul style="list-style-type: none"> <li>• MMN supplementation may decrease oxidative stress both in serum and follicular fluid proteins and is positively associated with oocyte quality in women undergoing IVF</li> </ul> |

| Study (country)                                                         | Study characteristics                                                |                      | Number of patients, N         |                  | Mean age ± SD (range), y    | Supplements/control groups                                 |             | Results                                                                                                                                                                                                                                                                                                                        | Author conclusions                                                                                                                                                                                                                                                                                                                                               |
|-------------------------------------------------------------------------|----------------------------------------------------------------------|----------------------|-------------------------------|------------------|-----------------------------|------------------------------------------------------------|-------------|--------------------------------------------------------------------------------------------------------------------------------------------------------------------------------------------------------------------------------------------------------------------------------------------------------------------------------|------------------------------------------------------------------------------------------------------------------------------------------------------------------------------------------------------------------------------------------------------------------------------------------------------------------------------------------------------------------|
|                                                                         | Design                                                               | Duration             | Multiple micronutrients (MMN) | Control group(s) |                             | Investigational product: folate [µg] vs. Control           | Taken PC    |                                                                                                                                                                                                                                                                                                                                |                                                                                                                                                                                                                                                                                                                                                                  |
| Nouri et al 2017 <sup>9</sup>                                           | Pilot, non-blind RCT in women undergoing IVF                         | 28-56 d prior to COS | 50                            | 50               | Median 37.1 (IQR 33.6-40.2) | PROfertil® female (Lenus Pharma GesmbH): 800 vs. FA: 400   | Yes         | <ul style="list-style-type: none"> <li>• Median fertilization rate significantly higher with MMN (66.7%) vs. FA use (42.9%)</li> <li>• Significantly more MMN patients with at least one high quality embryo (29%) vs. FA patients (18%)</li> </ul>                                                                            | <ul style="list-style-type: none"> <li>• Use of MMN supplementation for a minimum of 28 d is beneficial in terms of fertilization rate and embryo quality</li> </ul>                                                                                                                                                                                             |
| Youssef et al 2015 <sup>10</sup>                                        | RCT in women with unexplained infertility                            | 58 d                 | 112                           | 106              | 30.9±5.7 (MMN group)        | Octatron® (Nerhadou International) + FA: 2500 vs. FA: 2500 | Yes, and T1 | <ul style="list-style-type: none"> <li>• No significant differences between groups, including number of mature oocytes and clinical pregnancy rate</li> </ul>                                                                                                                                                                  | <ul style="list-style-type: none"> <li>• Oral antioxidants from MMN did not improve oocyte quality and pregnancy rates in women with unexplained infertility undergoing IVF/ICSI treatment</li> </ul>                                                                                                                                                            |
| <i>Impact on the time to pregnancy and chances of becoming pregnant</i> |                                                                      |                      |                               |                  |                             |                                                            |             |                                                                                                                                                                                                                                                                                                                                |                                                                                                                                                                                                                                                                                                                                                                  |
| Ruder et al 2014 <sup>11</sup>                                          | Secondary data analysis of RCT in women with unexplained infertility | —                    | 368                           | —                | 33.1                        | MMN (type not specified)                                   | Yes         | <p>TTP was shorter among women:</p> <ul style="list-style-type: none"> <li>• with BMI &lt;25 kg/m<sup>2</sup> with increasing vitamin C</li> <li>• with BMI ≥25 kg/m<sup>2</sup> with increasing β-carotene</li> <li>• &lt;35 y with increasing β-carotene and vitamin C</li> <li>• ≥35 y with increasing vitamin E</li> </ul> | <ul style="list-style-type: none"> <li>• Increased intakes of β-carotene, vitamin C, and vitamin E were associated with shorter TTP, but the effect of these antioxidant nutrients varied with BMI and age</li> <li>• The results are consistent with the hypothesis that increased antioxidant intake is positively associated with female fertility</li> </ul> |
| Westphal et al 2004/2006 <sup>12,13</sup>                               | Double-blind, PBO-controlled RCT in women struggling to conceive     | 3 mo                 | 53                            | 40               | 35.4 (MMN group)            | FertilityBlend™ (Daily Wellness Co.) vs. Placebo           | Yes         | <ul style="list-style-type: none"> <li>• Significant increase in average number of days in cycle with basal temperature &gt;37°C during the luteal phase with MMN vs. baseline</li> </ul>                                                                                                                                      | <ul style="list-style-type: none"> <li>• MMN supplementation may provide an attractive alternative or complement to conventional fertility therapy</li> </ul>                                                                                                                                                                                                    |

| Study (country)                  | Study characteristics                                         |          | Number of patients, N         |                  | Mean age ± SD (range), y | Supplements/control groups                                      |          | Results                                                                                                                                                                                                                                                                                                                                                                                                                   | Author conclusions                                                                                                                                                                                                                                                                                                                                        |
|----------------------------------|---------------------------------------------------------------|----------|-------------------------------|------------------|--------------------------|-----------------------------------------------------------------|----------|---------------------------------------------------------------------------------------------------------------------------------------------------------------------------------------------------------------------------------------------------------------------------------------------------------------------------------------------------------------------------------------------------------------------------|-----------------------------------------------------------------------------------------------------------------------------------------------------------------------------------------------------------------------------------------------------------------------------------------------------------------------------------------------------------|
|                                  | Design                                                        | Duration | Multiple micronutrients (MMN) | Control group(s) |                          | Investigational product: folate [µg] vs. Control                | Taken PC |                                                                                                                                                                                                                                                                                                                                                                                                                           |                                                                                                                                                                                                                                                                                                                                                           |
|                                  |                                                               |          |                               |                  |                          |                                                                 |          | <ul style="list-style-type: none"> <li>• Increase in mean midluteal phase progesterone level with MMN vs. baseline, significant in women with the lowest progesterone levels at baseline</li> <li>• Short and long cycles were normalized with MMN</li> <li>• No notable changes at all with PBO</li> <li>• After 3 mo, 26% of MMN women pregnant vs. 10% PBO women; three more MMN women conceived after 6 mo</li> </ul> | <ul style="list-style-type: none"> <li>• Nutritional supplementation may play an important role in optimizing fertility health</li> </ul>                                                                                                                                                                                                                 |
| Agrawal et al 2012 <sup>14</sup> | Pilot, double-blind RCT in women with unexplained infertility | 3-6 mo   | 30                            | 28               | 32.2 (MMN group)         | Pregnacare Conception (Vitabiotics) + FA: 400 + 400 vs. FA: 400 | Yes      | <p>Compared with FA alone, women using MMN supplementation had:</p> <ul style="list-style-type: none"> <li>• significantly fewer attempts to achieve pregnancy</li> <li>• a significantly higher cumulative clinical pregnancy rate (66.7% vs. 39.3%)</li> <li>• a significantly higher ongoing pregnancy rate (60.0% vs. 25.0%)</li> </ul>                                                                               | <ul style="list-style-type: none"> <li>• Study suggests that women who use adjuvant MMN supplementation during ovulation induction have a higher chance of pregnancy compared with women on FA alone</li> <li>• Women susceptible to micronutrient deficiencies should receive micronutrient supplements to optimize their reproductive health</li> </ul> |

BMI, body mass index; COS, controlled ovarian stimulation; d, days; FA, folic acid; FF, follicular fluid; FO, follow-up; GSH-Px, glutathione peroxidase; HCY, homocysteine; IQR, interquartile range; IVF-ET, in vitro fertilization-embryo transfer; LP, lipid peroxidation; MMN, multiple micronutrients; mo, months; PBO, placebo; PC, pre-conception; PP, post-partum; RBC, red blood cells; RCT, randomized, controlled trial; ROS, reactive oxygen species; SD, standard deviation; T1, first trimester; TTP, time to pregnancy; wks, weeks; y, years.

## Supplementary references

1. Czeizel A, Métneki J, Dudás I. The effect of preconceptional multivitamin supplementation on fertility. *Int J Vitam Nutr Res.* 1996;66(1):55-58.
2. Cueto H, Riis A, Hatch E, et al. Folic acid supplementation and fecundability: a Danish prospective cohort study. *Eur J Clin Nutr.* 2015;70(1):66-71.
3. Chavarro JE, Rich-Edwards JW, Rosner BA, Willett WC. Use of multivitamins, intake of B vitamins, and risk of ovulatory infertility. *Fertil Steril.* 2008;89(3):668-676.
4. La Vecchia I, Paffoni A, Castiglioni M, et al. Folate, homocysteine and selected vitamins and minerals status in infertile women. *Eur J Contracept Reprod Health Care.* 2017;22(1):70-75.
5. Özkaya M, Nazıroğlu M, Barak C, Berkkanoglu M. Effects of multivitamin/mineral supplementation on trace element levels in serum and follicular fluid of women undergoing in vitro fertilization (IVF). *Biol Trace Elem Res.* 2011;139(1):1-9.
6. Sun N-X, Xu C, Zhang Q, Lu X-M, Li W. Impact of multivitamin supplementation on trace element levels in serum and follicular fluid of women undergoing in vitro fertilisation. *J Development Med.* 2013;1(2):74-77.
7. Özkaya M, Nazıroğlu M. Multivitamin and mineral supplementation modulates oxidative stress and antioxidant vitamin levels in serum and follicular fluid of women undergoing in vitro fertilization. *Fertil Steril.* 2010;94(6):2465-2466.
8. Luddi A, Capaldo A, Focarelli R, et al. Antioxidants reduce oxidative stress in follicular fluid of aged women undergoing IVF. *Reprod Biol Endocrinol.* 2016;14(1):57.
9. Nouri K, Walch K, Weghofer A, Imhof M, Egarter C, Ott J. The impact of a standardized oral multinutrient supplementation on embryo quality in in vitro fertilization/intracytoplasmic sperm injection: a prospective randomized trial. *Gynecol Obstet Invest.* 2017;82(1):8-14.
10. Youssef MA, Abdelmoty HI, Elashmwi HA, et al. Oral antioxidants supplementation for women with unexplained infertility undergoing ICSI/IVF: randomized controlled trial. *Hum Fertil (Camb).* 2015;18(1):382-342.
11. Ruder EH, Hartman TJ, Reindollar RH, Goldman MB. Female dietary antioxidant intake and time to pregnancy among couples treated for unexplained infertility. *Fertil Steril.* 2014;101(3):759-766.
12. Westphal L, Polan M, Trant A, Mooney S. A nutritional supplement for improving fertility in women. A pilot study. *J Reprod Med.* 2004;49:289-293.
13. Westphal L, Polan M, Trant A. Double-blind, placebo-controlled study of Fertilityblend: a nutritional supplement for improving fertility in women. *Clin Exp Obstet Gynecol.* 2006;33(4):205-208.
14. Agrawal R, Burt E, Gallagher AM, Butler L, Venkatakrishnan R, Peitsidis P. Prospective randomized trial of multiple micronutrients in subfertile women undergoing ovulation induction: a pilot study. *Reprod Biomed Online.* 2012;24(1):54-60.
